# Supplementary material for: Porous framework materials for stable Zn anodes in aqueous zinc-ion batteries
Source: Royal Society of Chemistry journal article supplement (doi:10.1039/d3qi01222k), 2023-01-01
Supplement: d3qi01222k1.pdf [file d3qi01222k1.pdf]

## Supporting Information

### **Porous Framework Materials for Stable Zn Anode in Aqueous Zinc-Ion Batteries**

Liling Lei, Jiahao Dong, Siwen Ke, Shishan Wu,\* and Shuai Yuan\*

*State Key Laboratory of Coordination Chemistry, Key Laboratory of Mesoscopic Chemistry of MOE, School of Chemistry and Chemical Engineering, Nanjing University, Nanjing 210023, P. R. China*

*E-mail: syuan@nju.edu.cn; shishanwu@nju.edu.cn*

Table S1. Electrochemical performance of MOFs/COFs-based Zn anode

| Materials                                                    | Metal | Organic ligand                                                     | Maximum pore size, <sup>a</sup><br>BET surface area <sup>b</sup> | Morphology                       | Uses                 | Lifespan, Voltage<br>hysteresis                                         | ( $\tau_{Zn^{2+}}$ ), $\sigma$             | Ref |
|--------------------------------------------------------------|-------|--------------------------------------------------------------------|------------------------------------------------------------------|----------------------------------|----------------------|-------------------------------------------------------------------------|--------------------------------------------|-----|
| ZIF-8                                                        | Zn    | 2-methylimidazole                                                  | 12 Å, 1,879 m <sup>2</sup> g <sup>-1</sup>                       | Nanoparticles                    | Coating layer        | 30 mV, 1200 h at 2 mA<br>cm <sup>-2</sup> , 1 mAh cm <sup>-2</sup>      |                                            | 1   |
| ZIF-8                                                        | Zn    | 2-methylimidazole                                                  | 12 Å, 1,879 m <sup>2</sup> g <sup>-1</sup>                       | Nanoparticles                    | Electrolyte additive | 55 mV, over 560 h at 1 mA<br>cm <sup>-2</sup> , 1 mAh cm <sup>-2</sup>  |                                            | 2   |
| ZIF-8-500                                                    | Zn    | 2-methylimidazole                                                  | 12 Å, 1,635 m <sup>2</sup> g <sup>-1</sup>                       | Nanoparticles                    | Zn host              | 30 mV, 1.0 mA cm <sup>-2</sup> , 1.0<br>mAh cm <sup>-2</sup>            |                                            | 3   |
| ZIF-L                                                        | Zn    | 2-methylimidazole                                                  | 12 Å, 93 m <sup>2</sup> g <sup>-1</sup>                          | Leaflike shaped<br>nanoparticles | Coating layer        | 26 mV, 800 h, 0.25 mA<br>cm <sup>-2</sup> and 0.25 mAh cm <sup>-2</sup> | 39.1 mS m <sup>-1</sup>                    | 4   |
| ZIF-7                                                        | Zn    | benzimidazole                                                      | 4 Å, 380 m <sup>2</sup> g <sup>-1</sup>                          | Tetragonal<br>nanoparticles      | Coating layer        | 28 mV, 3000 h, 0.5 mA<br>cm <sup>-2</sup> , 0.5 mAh cm <sup>-2</sup>    |                                            | 5   |
| Zn(BTC)                                                      | Zn    | 1, 3, 5-<br>benzenetricarboxylate                                  | 14 Å, 1600 m <sup>2</sup> g <sup>-1</sup>                        | Nanoparticles                    | Coating layer        | 40 mV, 800 h, 1 mA cm <sup>-2</sup> ,<br>1 mA cmh <sup>-2</sup>         |                                            | 6   |
| Zn(TCPP)                                                     | Zn    | tetra-(4-carboxyphenyl)<br>porphyrin                               |                                                                  | Nanoplates                       | Coating layer        | 50 mV, 1880 h, 5 mA cm <sup>-2</sup> ,<br>0.5 mAh cm <sup>-2</sup>      |                                            | 7   |
| Zn-stp-bpy                                                   | Zn    | monosodium 2-<br>sulfoterephthalate (stp)<br>4,4'-bipyridine (bpy) |                                                                  | Octahedral<br>nanoparticles      | Coating layer        | 40 mV, 5700 h at 2 mA cm <sup>-2</sup>                                  | 0.63, 0.68 mS<br>cm <sup>-1</sup> at 30 °C | 8   |
| Zn[Fe<br>(CN) <sub>6</sub> ] <sub>n</sub> ·nH <sub>2</sub> O | Zn    | [Fe(CN) <sub>6</sub> ] <sup>3-</sup>                               |                                                                  | Nanocubes                        | Coating layer        | 80 mV, 2100 h, 4 mA cm <sup>-2</sup> ,<br>4 mA cm <sup>-2</sup>         | 0.88                                       | 9   |
| Cu <sub>3</sub> (BTC) <sub>2</sub>                           | Cu    | 1,3,5-benzenetricarboxylic<br>acid                                 | 14 Å, 1600 m <sup>2</sup> g <sup>-1</sup>                        | Nanocubes                        | Coating layer        | 20 mV, 700 h, 0.5 mA cm <sup>-2</sup>                                   |                                            | 10  |

|                             |    |                                                                |                                               |                          |                   |                                                                                                                                   |                                                |    |
|-----------------------------|----|----------------------------------------------------------------|-----------------------------------------------|--------------------------|-------------------|-----------------------------------------------------------------------------------------------------------------------------------|------------------------------------------------|----|
| UiO-66                      | Zr | terephthalic acid                                              | 8 Å, 1200 m <sup>2</sup> g <sup>-1</sup>      | Octahedral nanoparticles | Coating layer     | 50 mV, 250 h, 1 mA cm <sup>-2</sup> , 0.5 mAh cm <sup>-2</sup>                                                                    |                                                | 11 |
| Defective UiO-66 (D-UiO-66) | Zr | terephthalic acid                                              | 10 Å, 1470 m <sup>2</sup> g <sup>-1</sup>     | Octahedral nanoparticles | Coating layer     | 66 mV, 1800 h, 1 mA cm <sup>-2</sup> , 1 mAh cm <sup>-2</sup>                                                                     | 0.60, 6.90 mS cm <sup>-1</sup>                 | 12 |
| UiO-66-(COOH) <sub>2</sub>  | Zr | 1,2,4,5-benzenetetracarboxylic acid(BTEC)                      | 6 Å, 519 m <sup>2</sup> g <sup>-1</sup>       | Spherical nanoparticles  | Coating layer     | 61 mV at 2 mA cm <sup>-2</sup> , 2 mAh cm <sup>-2</sup>                                                                           | 0.55, 1.91 mS cm <sup>-1</sup>                 | 13 |
| UiO-66-(COOH) <sub>2</sub>  | Zr | 1, 2, 4, 5-benzenetetracarboxylic acid (BTEC)                  | 6 Å, 461.6 m <sup>2</sup> g <sup>-1</sup>     | Nanoparticles            | Coating layer     | 50 mV, 240 h at 10 mA cm <sup>-2</sup> , 1 mAh cm <sup>-2</sup>                                                                   | 0.23                                           | 14 |
| 2D UiO-67                   | Zr | 4,4'-biphenyl dicarboxylic acid                                | 8 Å, 424 m <sup>2</sup> g <sup>-1</sup>       | Hexagonal nanoflakes     | Coating layer     | 30 mV, 800 h, 0.5 mA cm <sup>-2</sup> , 0.5 mA h cm <sup>-2</sup>                                                                 | 0.84, 2.65 mS cm <sup>-1</sup>                 | 15 |
| EDTA grafted MOF-808        | Zr | 1,3,5-benzenetricarboxylic acid                                | 11.8 Å, 968.01 m <sup>2</sup> g <sup>-1</sup> | Octahedron nanoparticles | Coating layer     | 40 mV, 900 h, 2 mA cm <sup>-2</sup> , 2 mA h cm <sup>-2</sup> ; 30 mV, 300 h at 1 mA cm <sup>-2</sup> at 10 mA h cm <sup>-2</sup> | 0.53                                           | 16 |
| MOF-808                     | Zr | 1,3,5-benzenetricarboxylic acid                                | 18.4 Å, 1820 m <sup>2</sup> g <sup>-1</sup>   | Octahedron nanoparticles | Solid electrolyte | 100 mV, 360 h, 0.1mA cm <sup>-2</sup>                                                                                             | 0.93, 2.1×10 <sup>-1</sup> mS cm <sup>-1</sup> | 17 |
| F-COF                       |    | 2, 3, 5,6-tetrafluoroterephthaldehyde (TFTA)                   | 20 Å, 723 m <sup>2</sup> g <sup>-1</sup> ,    | Film                     | Coating layer     | 60 mV, 1700 h, 5 mA cm <sup>-2</sup> , 1 mAh cm <sup>-2</sup>                                                                     | 0.75, 24.19 mS cm <sup>-1</sup>                | 18 |
| flexible DIP D COF films    |    | 1, 3, 5-tris (4-amino-phenyl) benzene (TAPB)                   | 217.5 m <sup>2</sup> g <sup>-1</sup>          | Film                     | Coating layer     | 36 mV, 420 h at 1 mA cm <sup>-2</sup> , 1 mAh cm <sup>-2</sup>                                                                    | 0.56                                           | 19 |
|                             |    | 1,3,5-triphloroglucinol (TFP), 2,6-diaminoanthraquinone (DAAQ) |                                               |                          |                   |                                                                                                                                   |                                                |    |

|                                        |                                                                                                  |                                                                                      |                       |                   |                                                                                                                                 |                                                                |    |
|----------------------------------------|--------------------------------------------------------------------------------------------------|--------------------------------------------------------------------------------------|-----------------------|-------------------|---------------------------------------------------------------------------------------------------------------------------------|----------------------------------------------------------------|----|
| 3D-COOH-COF; OH-COF                    | succinic anhydride, OH-COF; tetra(4-formylphenyl) methane (TFPM), 3,3'-dihydroxybenzidine (DHBD) | 13 Å, 121 m <sup>2</sup> g <sup>-1</sup> ; 16 Å 107.4 m <sup>2</sup> g <sup>-1</sup> | Film                  | Coating layer     | 50 mV, 2000 h, 1 mA cm <sup>-2</sup> , 1 mA h cm <sup>-2</sup> ; 60 mV, 1272 h, 1 mA cm <sup>-2</sup> , 1 mA h cm <sup>-2</sup> | 0.82; 0.69, 0.26 mS cm <sup>-1</sup> ; 0.2 mS cm <sup>-1</sup> | 20 |
| AAn-COF                                | 1,5-fiaminoanthraquinone                                                                         | 12 Å, 321 m <sup>2</sup> g <sup>-1</sup>                                             | Nanofiber             | Coating layer     | 20 mV, 1 mA cm <sup>-2</sup> , 1 mA h cm <sup>-2</sup>                                                                          |                                                                | 21 |
| MCOF-Ti <sub>6</sub> Cu <sub>3</sub>   | Cu(NO <sub>3</sub> ) <sub>2</sub> ·3H <sub>2</sub> O H-pyrazole-4-carbaldehyde                   | 23 Å, 152 m <sup>2</sup> g <sup>-1</sup>                                             | Nanosheet             | Coating layer     | 25 mV, at 1 mA h cm <sup>-2</sup> with 1 mA cm <sup>-2</sup>                                                                    |                                                                | 22 |
| 2D alkynyl-based COF (COF-H)           | 1,3,5-tris(arylethynyl)benzene; 2,4,6-triformylphloroglucinol                                    | 12 Å, 984.2 m <sup>2</sup> g <sup>-1</sup>                                           | Petal-like nanosheets | Coating layer     | 22.9 mV, 900 h at 3 mA cm <sup>-2</sup> , 1 mA h cm <sup>-2</sup>                                                               |                                                                | 23 |
| TpPa-SO <sub>3</sub> H                 | 2,5-diaminobenzenesulfonic acid; p-toluenesulfonic acid; 2,4,6-Triformylphloroglucinol           |                                                                                      | Film                  | Coating layer     | 25 mV, 900 h at 1 mA cm <sup>-2</sup> , 5 mA cm <sup>-2</sup>                                                                   | 18.56 mS cm <sup>-1</sup>                                      | 24 |
| 2D PI COF                              | tris (4-aminophenyl) amine(TAPA), 1,4,5,8-naphthalene tetracarboxylic dianhydride(NTCDA)         |                                                                                      | Film                  | Coating layer     | 92 mAh g <sup>-1</sup> ) at 0.7 A g <sup>-1</sup> , capacity remained 85% after 4000 <sup>th</sup> charge/discharge             |                                                                | 25 |
| TpPa-SO <sub>3</sub> Zn <sub>0.5</sub> | 1,3,5-triformylphloroglucinol (Tp), 1,4-phenylenediamine-2-sulfonic acid                         | 13 Å, 472 m <sup>2</sup> g <sup>-1</sup>                                             | Nanoparticles         | Solid electrolyte | 500 h, 60 mV at 0.1 mA cm <sup>-2</sup> , 0.1 mA h cm <sup>-2</sup>                                                             | 0.91, 22 mS cm <sup>-1</sup>                                   | 26 |

---

|         |                                                                                        |     |                                                                |    |
|---------|----------------------------------------------------------------------------------------|-----|----------------------------------------------------------------|----|
| HqTpCOF |                                                                                        | SEI | 700 h, 35 mV at 1 mA cm <sup>-2</sup> , 1 mAh cm <sup>-2</sup> | 27 |
|         | 2,5-diaminohydroquinone<br>dihydrochloride (Hq),2,4,6-<br>triformylphloroglucinol (Tp) |     |                                                                |    |

---

<sup>a</sup> Pore sizes of MOFs and COFs were estimated based on their crystal structures.

<sup>b</sup> BET surface areas of MOFs and COFs were calculated from N<sub>2</sub> adsorption measurements of the cited reference. If the BET surface area was not reported in the cited reference of ZIBs, the BET data were taken from other literature reporting the same MOFs/COFs.

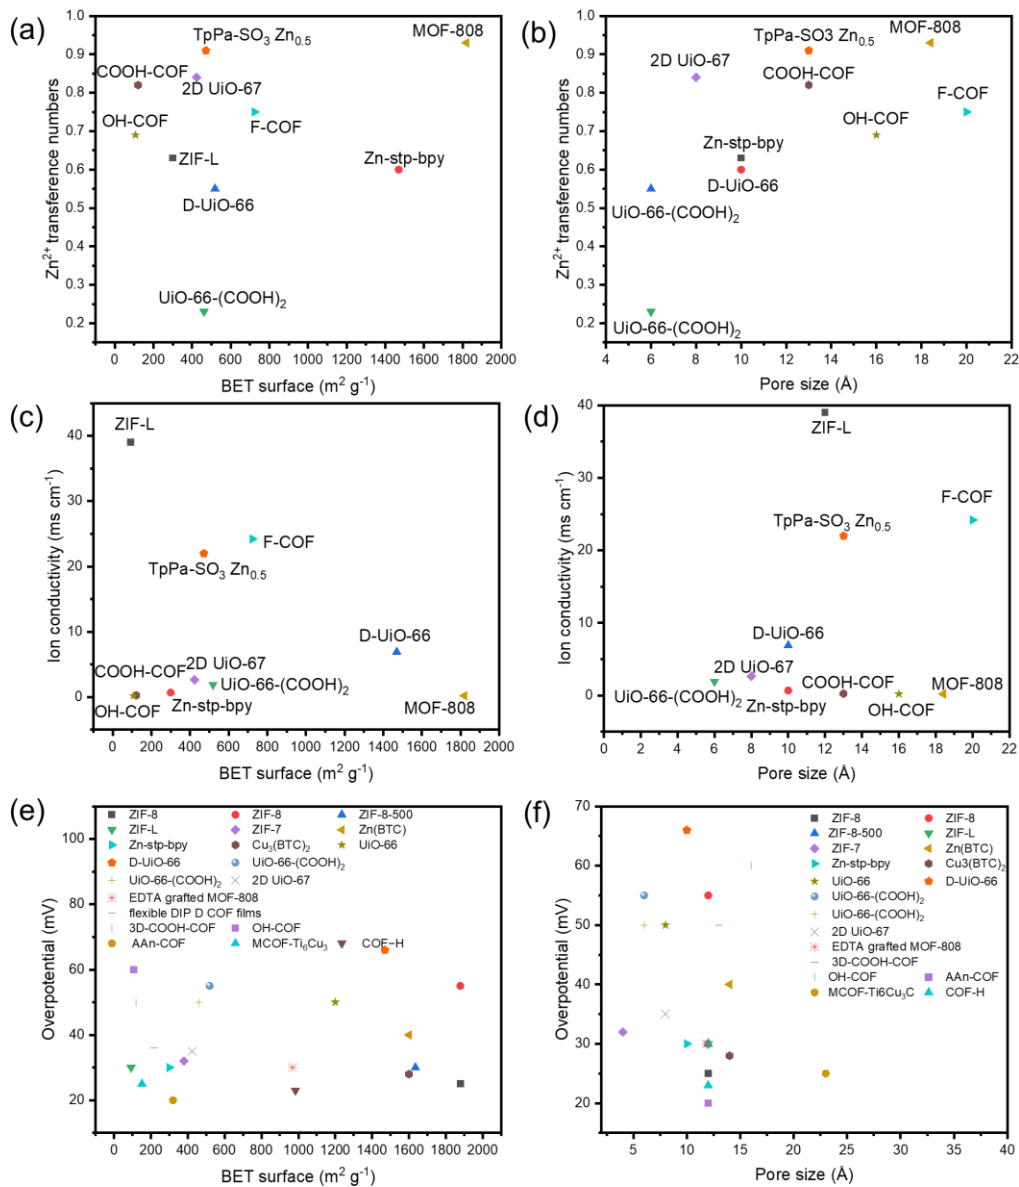

**Fig. S1** (a) Relationship of BET surface and  $Zn^{2+}$  transference numbers. (b) Relationship of pore size and  $Zn^{2+}$  transference numbers. (c) Relationship of BET surface and  $Zn^{2+}$  conductivity. (d) Relationship of pore size and  $Zn^{2+}$  conductivity. (e) Relationship between BET surface of MOFs/COFs and overpotential of assembled symmetric cell with these MOFs/COFs protected Zn at a current density of 1 mA cm<sup>-2</sup>. (f) Relationship between pore size of MOFs/COFs and overpotential of assembled symmetric cell with these MOFs/COFs protected Zn at a current density of 1 mA cm<sup>-2</sup>.

## References

1. X. Q. Liu, F. Yang, W. Xu, Y. X. Zeng, J. J. He and X. H. Lu, Zeolitic imidazolate frameworks as Zn<sup>2+</sup> modulation layers to enable dendrite-free Zn anodes, *Adv. Sci.*, 2020, **7**, 2002173.
2. X. J. Gong, J. Wang, Y. Shi, Q. Zhang, W. X. Liu, S. Wang, J. L. Tian and G. C. Wang, Inhibiting dendrites on Zn anode by ZIF-8 as solid electrolyte additive for aqueous zinc ion battery, *Colloids Surf. A Physicochem. Eng. Asp.*, 2023, **656**, 130255.
3. Z. Wang, J. H. Huang, Z. W. Guo, X. L. Dong, Yao Liu, Y. G. Wang, and Y. Y. Xia, A metal-organic framework host for highly reversible dendrite-free zinc metal anodes, *Joule*, 2019, **3**, 1289-1300.
4. W. X. He, T. T. Gu, X. J. Xu, S. Y. Zuo, J. D. Shen, J. Liu and M. Zhu, Uniform in situ grown ZIF-L layer for suppressing hydrogen evolution and homogenizing Zn deposition in aqueous Zn-ion batteries, *ACS Appl. Mater. Interfaces*, 2022, **14**, 40031-40042.
5. H. J. Yang, Z. Chang, Y. Qiao, H. Deng, X. W. Mu, P. He and H. S. Zhou, Constructing a super-saturated electrolyte front surface for stable rechargeable aqueous zinc batteries, *Angew. Chem. Int. Ed.*, 2020, **59**, 9377-9381.
6. Y. Wang, Y. N. Liu, H. Q. Wang, S. M. Dou, W. Gan, L. J. Ci, Y. Huang and Q. H. Yuan, MOF-based ionic sieve interphase for regulated Zn<sup>2+</sup> flux toward dendrite-free aqueous zinc-ion batteries, *J. Mater. Chem. A*, 2022, **10**, 4366-4375.
7. F. F. Wang, H. T. Lu, H. Li, J. Li, L. Wang, D. L. Han, J. C. Gao, C. N. Geng, C. J. Cui and Z. C. Zhang, Z. Weng, C. P. Yang, J. Lu, F. Y. Kang, Q-H Yang, Demonstrating U-shaped zinc deposition with 2D metal-organic framework nanoarrays for dendrite-free zinc batteries, *Energy Stor. Mater*, 2022, **50**, 641–647.
8. Z. Q. Wang, H. G. Chen, H. S. Wang, W. Y. Huang, H. Y. Li and F. Pan, In situ growth of a metal-organic framework-based solid electrolyte interphase for highly reversible Zn anodes, *ACS Energy Lett.*, 2022, **7**, 4168-4176.
9. H. H. Sun, H. Y. Yu, N. Li, D. Lei, H. Y. Liu, W. Hua, C. G. Wei, F. Y. Kang, and J-G Wang, A seamless metal-organic framework interphase with boosted Zn<sup>2+</sup> flux and deposition kinetics for long-living rechargeable Zn batteries, *Nano Lett.*, 2023, **23**, 1726–1734.
10. L. S. Cao, D. Li, T. Deng, Q. Li and C. S. Wang, Hydrophobic organic-electrolyte-protected zinc anodes for aqueous zinc batteries, *Angew. Chem. Int. Ed.*, 2020, **59**, 19292–19296.
11. M. Q. Liu, L. Y. Yang, H. Liu, A. Amine, Q. H. Zhao, Y. L. Song, J. L. Yang, K. Wang, and F. Pan, Artificial solid-electrolyte interface facilitating dendrite-free zinc metal anodes via nano-wetting effect, *ACS Appl. Mater. Interfaces.*, 2019, **11**, 32046–32051.
12. X. E. Xu, Y. F. Xu, J. T. Zhang, Y. Zhong, Z. X. Li, H. Y. Qiu, H. B. Wu, J. Wang, X. L. Wang and C. D. Gu and J. p. Tu, Quasi-solid electrolyte interphase boosting charge and mass transfer for dendrite-free zinc battery, *Nano-Micro Lett.*, 2023, **15**, 56.
13. W. L. Xin, J. Xiao, J. W. Li, L. Zhang, H. L. Peng, Z. C. Yan and Z. Q. Zhu, Metal-organic frameworks with carboxyl functionalized channels as multifunctional ion-conductive interphase for highly reversible Zn anode, *Energy Stor. Mater.*, 2023, **56** 76–86.
14. E. Kim, I. Choi, K. W. Nam, Metal-organic framework for dendrite-free anodes in aqueous rechargeable zinc batteries, *Electrochim Acta*, 2022, **425**, 140648.
15. L. L. Lei, F. F. Chen, Y. L. Wu, J. Shen, X.-J. Wu, S. S. Wu and S. Yuan, Surface coatings of two-dimensional metal-organic framework nanosheets enable stable zinc anodes, *Sci. China-Chem.*, 2022, **65**, 1-9.
16. R. C. Zhang, Y. Feng, Y.X. Ni, B. D. Zhong, M. Y. Peng, T. J. Sun, S. Chen, H. Wang, Z. L. Tao, and K. Zhang, Bifunctional interphase with target-distributed desolvation sites and directionally depositional ion flux for sustainable zinc anode, *Angew. Chem. Int. Ed.*, 2023, e202304503.

17. Z. Q. Wang, J. T. Hu, L. Han, Z. J. Wang, H. B. Wang, Q. H. Zhao, J. J. Liu and F. Pan, A MOF-based single-ion Zn<sup>2+</sup> solid electrolyte leading to dendrite-free rechargeable Zn batteries, *Nano Energy*, 2019, **56**, 92-99.
18. Z. Zhao, R. Wang, C. X. Peng, W. Chen, T. Q. Wu, B. Hu, W. J. Weng, Y. Yao, J. X. Zeng and Z. H. Chen, P. Y. Liu, Y. C. Liu, G. S. Li, J. Guo, H. B. Lu, Z. P. Guo, Horizontally arranged zinc platelet electrodeposits modulated by fluorinated covalent organic framework film for high-rate and durable aqueous zinc ion batteries, *Nat. Commun.*, **12**, 6606
19. P. Xue, C. Guo, L. Li, H. P. Li, D. Luo, L. C. Tan and Z. W. Chen, A MOF-derivative decorated hierarchical porous host enabling ultrahigh rates and superior long-term cycling of dendrite-free Zn metal anodes, *Adv. Mater.*, 2022, **34**, e2110047.
20. J. H. Park, M. J. Kwak, C. Hwang, K. N. Kang, N. Liu, J. H. Jang and B. A. Grzybowski, Self-assembling films of covalent organic frameworks enable long-term, efficient cycling of zinc-ion batteries, *Adv. Mater.*, 2021, **33**, 2101726.
21. C. Guo, J. Zhou, Y. T. Chen, H. F. Zhuang, Q. Li, J. Li, X. Tian, Y. L. Zhang, X. M. Yao and Y. F. Chen and S-L Li, Y-Q Lan, Synergistic manipulation of hydrogen evolution and zinc ion flux in metal-covalent organic frameworks for dendrite-free Zn-based aqueous batteries, *Angew. Chem. Int. Ed.*, 2022, **134**, e202210871.
22. C. Guo, J. Zhou, Y. T. Chen, H. F. Zhuang, J. Li, J. Huang, Y. Zhang, Y. Chen, S-L. Li and Y-Q. Lan, Integrated micro space electrostatic field in aqueous Zn-ion battery: scalable electro spray fabrication of porous crystalline anode coating, *Angew. Chem. Int. Ed.*, 2023, **62**, e202300125.
23. X. Hu, Z. Lin, S. Wang, G. Zhang, S. Lin, T. Huang, R. Chen, L.-H. Chung and J. He, Highly crystalline flower-like covalent-organic frameworks enable highly stable zinc metal anodes, *ACS Appl. Energy Mater.*, 2022, **5**, 82-89.
24. Z. Q. Wang, L. B. Dong, W. Y. Huang, H. Jia, Q. H. Zhao, Y. D. Wang, B. Fei and F. Pan, Simultaneously regulating uniform Zn<sup>2+</sup> flux and electron conduction by MOF/rGO interlayers for highPerformance Zn anodes, *Nano-micro lett.*, 2021, **13**, 73.
25. M. H Yu, N. Chandrasekhar, R. K. M. Raghupathy, K. Hoang Ly, H. Z. Zhang, E. Dmitrieva, C. L. Liang, X. H. Lu, T. D. Kühne, H. Mirhosseini, I M. Weidinger, and X. L. Fen, A High-Rate Two-dimensional polyarylimide covalent organic framework anode for aqueous Zn-ion energy storage devices, *J. Am. Chem. Soc.*, 2020, **142**, 19570-19578.
26. S. Park, I. Kristanto, G. Y. Jung, D. B. Ahn, K. Jeong, S. K. Kwak and S.-Y. Lee, A single-ion conducting covalent organic framework for aqueous rechargeable Zn-ion batteries, *Chem Sci.*, 2020, **11**, 11692-11698.
27. V. Aupama, W. Kao-ian, J. Sangsawang, G. Mohan, S. Wannapaiboon, A. A. Mohamad, P. Pattananuwat, C. Sriprachuabwong, W.-R. Liu and S. Kheawhom, Stabilizing a zinc anode via a tunable covalent organic framework-based solid electrolyte interphase, *Nanoscale*, 2023, **15**, 9003-9013.
